# Supplementary material for: Advanced Practice Provider Critical Care Boot Camp: A Simulation-Based Curriculum
Source: PubMed Central journal article supplement — J Med Educ Curric Dev. 2019 Apr 8;6:2382120519840350. doi: 10.1177/2382120519840350 (PMC6454646; doi:10.1177/2382120519840350), 2019-04-08
Supplement: VCSL_Lumbar_Puncture_-_STEP_2_(1)_xyz143403a25ec14_(1).pdf [file VCSL_Lumbar_Puncture_-_STEP_2_%281%29_xyz143403a25ec14_%281%29.pdf]

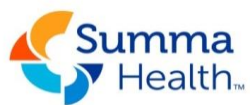

## VIRTUAL CARE SIMULATION LAB

### PERFORMANCE EVALUATION PROCEDURE:

| Lumbar Puncture                                                                                                                                                               |                                  |                                                                                           |      |
|-------------------------------------------------------------------------------------------------------------------------------------------------------------------------------|----------------------------------|-------------------------------------------------------------------------------------------|------|
| <b>PRINT Name of Examinee:</b>                                                                                                                                                |                                  |                                                                                           |      |
| <b>PRINT Specialty of Examinee:</b>                                                                                                                                           |                                  |                                                                                           |      |
| <b>Is the Examinee a Resident?    CIRCLE Y/N:    YES    NO    OTHER:</b>                                                                                                      |                                  |                                                                                           |      |
| <b>PRINT Evaluator's Name:</b>                                                                                                                                                |                                  |                                                                                           |      |
| EVALUATOR: Please CIRCLE OR CHECK - PASS OR FAIL on the front of this document, to include your signature below.                                                              |                                  |                                                                                           |      |
| <b>PASS:</b><br><br><b>EVALUATOR SIGNATURE:</b>                                                                                                                               | <b>FAIL:</b><br><br><b>DATE:</b> | <div style="border: 1px solid black; padding: 2px;">Electronic Pass/Fail Link Below</div> |      |
| <b>NOTE: Automatic failure if highlighted areas, also italicized &amp; bold - are not answered correctly.</b>                                                                 |                                  |                                                                                           |      |
| Lumbar Puncture - Page 1 of 2                                                                                                                                                 |                                  | PASS                                                                                      | FAIL |
| ASSESSES PATIENT                                                                                                                                                              |                                  |                                                                                           |      |
| Reviews lab data: PT/PTT, Hemogram                                                                                                                                            |                                  |                                                                                           |      |
| Obtain baseline neurological assessment, including assessment for increased intracranial pressure and/or meningeal irritation                                                 |                                  |                                                                                           |      |
| Reviews patient's medical history and assess for spinal surgery or deformities, coagulopathies, active therapy with heparin, coumadin, plavix, ASA and allergies to lidocaine |                                  |                                                                                           |      |
| Assess patient's ability to cooperate with the procedure                                                                                                                      |                                  |                                                                                           |      |
| OBTAINS EQUIPMENT                                                                                                                                                             |                                  |                                                                                           |      |
| Face shield mask, cap, sterile gloves, sterile gown                                                                                                                           |                                  |                                                                                           |      |
| Lumbar Puncture kit                                                                                                                                                           |                                  |                                                                                           |      |
| Additional sterile drapes                                                                                                                                                     |                                  |                                                                                           |      |
| <b><i>Betadine, not Chlorhexidine and why?</i></b>                                                                                                                            |                                  |                                                                                           |      |
| Specimen labels and requisition: Tube 1 (glucose, protein), Tube 2 (culture and gram stains), Tube 3 (cell count with diff), Tube 4 (other)                                   |                                  |                                                                                           |      |
| EDUCATES PATIENT/FAMILY                                                                                                                                                       |                                  |                                                                                           |      |
| <b><i>Summarizes indications, risks, benefits, process; ensures patient/family understanding</i></b>                                                                          |                                  |                                                                                           |      |
| <b><i>Explains positioning requirements and the need to lie flat for several hours after procedure</i></b>                                                                    |                                  |                                                                                           |      |
| <b><i>Obtains consent as appropriate -&gt; Checks patient ID (Time Out)</i></b>                                                                                               |                                  |                                                                                           |      |
| PREPARES PATIENT                                                                                                                                                              |                                  |                                                                                           |      |
| Determines need for further assistance to ensure patient safety: additional staff, medications                                                                                |                                  |                                                                                           |      |
| Positions patient in the lateral decubitus position near the side of the bed with head flexed to chest and knees bent up toward chest                                         |                                  |                                                                                           |      |
| Checks landmarks for optimum site; able to locate L3-L4 (level with iliac crest), L4-L5, L5-S1 intravertebral spaces                                                          |                                  |                                                                                           |      |
| Initial preparation of site with Betadine NOT Chlorhexidine                                                                                                                   |                                  |                                                                                           |      |

| <b>Lumbar Puncture - Page 2 of 2</b>                                                                                                                                                                                 |             |             |
|----------------------------------------------------------------------------------------------------------------------------------------------------------------------------------------------------------------------|-------------|-------------|
| <b>PREFORMS PROCEDURE</b>                                                                                                                                                                                            |             |             |
| <b>Washes hands and applies gloves maintaining sterility</b>                                                                                                                                                         |             |             |
| Opens and sets up kit: draws up lidocaine, sets up manometer, sets up 4 specimen tubes in numerical order of use                                                                                                     |             |             |
| <b>Drapes patient in sterile fashion and places sterile towel on bed near patient</b>                                                                                                                                |             |             |
| Relocates landmarks and puncture site                                                                                                                                                                                |             |             |
| <b>Re-preps site with Betadine</b>                                                                                                                                                                                   |             |             |
| Anesthetizes the area using 25 G needle making a wheal then changes to an 18 G needle for deeper into the posterior spinous region - aspirating as it is advanced before injecting                                   |             |             |
| Talks to patient about what is happening throughout procedure                                                                                                                                                        |             |             |
| Insert a 20 or 22 G spinal needle bevel up through the skin into the L4-L5 intravertebral space with the needle at a 15° angle cephalad, aiming toward the umbilicus, level with the sagittal midplane of the body   |             |             |
| If bone is encountered on insertion, pull back slightly and redirect needle, changing the angle slightly then reinsert                                                                                               |             |             |
| Once the needle has advanced 3-4 cm withdraw the stylus and observe for CSF return. If no CSF, replace stylus and advance slowly and recheck. A "popping" sensation is often felt with penetration of the dura mater |             |             |
| <b>Stops and analyzes why there is no CSF</b>                                                                                                                                                                        |             |             |
| Once CSF return is noted, attach the manometer to the needle hub by way of the 3-way stopcock                                                                                                                        |             |             |
| Have patient straighten legs, then read opening pressure by noting the fluid level in the manometer; notes color of fluid                                                                                            |             |             |
| Drain fluid from manometer into tube 1 and notes color of fluid                                                                                                                                                      |             |             |
| Return stopcock to the off position and discard manometer                                                                                                                                                            |             |             |
| Fill the tubes in sequential order from the hub of the spinal needle                                                                                                                                                 |             |             |
| Fill each tube a minimum of 1-2 ml CSF. Tubes 2 and 4 may need more fluid if additional cultures/tests needed                                                                                                        |             |             |
| Cover the opening of the spinal needle with a sterile gloved finger and replace the stylus                                                                                                                           |             |             |
| Withdraw the needle while holding pressure at site                                                                                                                                                                   |             |             |
| Cover site with bandage                                                                                                                                                                                              |             |             |
| Place patient in supine position                                                                                                                                                                                     |             |             |
| Make sure specimens are labeled appropriately and sent to laboratory                                                                                                                                                 |             |             |
| Disposes of sharps and contaminated supplies appropriately. Discards gloves and washes hands.                                                                                                                        |             |             |
| Documents procedure note                                                                                                                                                                                             |             |             |
| <b>TOTALS COUNT:</b>                                                                                                                                                                                                 |             |             |
| <b>(80% or above is passing score.) PERCENTAGE:</b>                                                                                                                                                                  |             |             |
| <b>RESULT CATEGORIES:</b>                                                                                                                                                                                            | <b>PASS</b> | <b>FAIL</b> |

| <b>PRACTICE BASED LEARNING AND IMPROVEMENT</b>        |  |
|-------------------------------------------------------|--|
| <b>Areas the resident feels he/she could improve:</b> |  |
|                                                       |  |
|                                                       |  |
|                                                       |  |
| <b>How the resident plans to improve:</b>             |  |
|                                                       |  |
|                                                       |  |
|                                                       |  |
